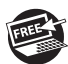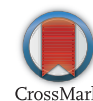

RESPONSE TO COMMENT ON STEGMAN ET AL.

# High-Intensity Statin Therapy Alters the Natural History of Diabetic Coronary Atherosclerosis: Insights From SATURN. *Diabetes Care* 2014;37:3114–3120

*Diabetes Care* 2015;38:e28–e29 | DOI: 10.2337/dc14-2552

Brian Stegman,<sup>1</sup> Rishi Puri,<sup>2</sup>  
Mingyuan Shao,<sup>2</sup> and  
Stephen J. Nicholls<sup>3</sup>

We appreciate interest of Drs. Huang and Chen (1) in our article (2). We agree that the diabetic population is heterogeneous in terms of cardiovascular risk, with varying comorbidities and duration and severity of diabetes per se. However, we disagree with the notion of the Study of Coronary Atheroma by Intravascular Ultrasound: Effect of Rosuvastatin Versus Atorvastatin (SATURN) cohort representing a purely low-risk population, as study inclusion required the presence of symptomatic coronary artery disease. Furthermore, 30% of the SATURN population was enrolled following an acute coronary syndrome (ACS) and 23% had a history of previous myocardial infarction. With regard to the relative low frequency of insulin use, while insulin dependency has previously been associated with greater atheroma burden (3), we observed no difference in the degree of atheroma regression (as measured by change in percent atheroma volume [ $P = 0.91$ ] or total atheroma volume [ $P = 0.81$ ]) when comparing insulin-treated with non-insulin-treated diabetic patients.

With regard to patients suffering an ACS, we felt it difficult to draw comparisons with the Integrated Biomarkers and Imaging Study-4 (IBIS-4) given that this study contained a mere nine diabetic patients (4). However, we did

perform further analysis of the SATURN population and found that diabetic patients enrolled following an ACS demonstrated significantly less percent atheroma volume regression when compared with nondiabetic ACS patients ( $-0.44 \pm 0.23$  vs.  $-1.54 \pm 0.22\%$ ,  $P < 0.001$ ). These findings are consistent with those from the Japan Assessment of Pitavastatin and Atorvastatin in Acute Coronary Syndrome (JAPAN-ACS) trial (5), suggesting a possible attenuation of the net plaque regressive effects of high-intensity statin therapy in diabetic patients suffering an ACS. It is important to note that this high-risk patient subset still demonstrated significant atheroma regression from baseline, underscoring the importance of intensive statin therapies in high-risk populations.

With regard to evaluating plaque composition, serial radiofrequency intravascular ultrasound was obtained only in a subset of the overall SATURN population (6). Thus, we are unable to comment on potential differential changes in plaque composition in patients with and without diabetes treated with high-intensity statins. Despite the known limitations of serial radiofrequency intravascular ultrasound imaging (7), the effects of high-intensity statins on coronary atheroma composition require further evaluation.

Last, we agree that glycemic control is an important component of managing patients with diabetes, especially for preventing microvascular events. However, prospective data demonstrating significant reductions in cardiovascular events following strict glycemic control are still lacking (8). While high-intensity statins are yet to be specifically tested in a randomized clinic trial of diabetic patients, current data strongly suggest significant reductions in cardiovascular event rates following intensive LDL cholesterol lowering with potent statins (9). Overall, the current data are in accordance with the recent American College of Cardiology and American Heart Association guidelines (10) that recommend high-intensity statin therapy for diabetic patients deemed to be at high risk or cardiovascular risk.

**Duality of Interest.** S.J.N. has received speaking honoraria from AstraZeneca, Pfizer, Merck/Schering-Plough, and Takeda; consulting fees from AstraZeneca, Pfizer, Merck/Schering-Plough, Takeda, Roche, Novo Nordisk, LipoScience, and Anthera; and research support from AstraZeneca and Lipid Sciences. No other potential conflicts of interest relevant to this article were reported.

## References

1. Huang B-T, Chen M. Comment on Stegman et al. High-intensity statin therapy alters the natural history of diabetic coronary atherosclerosis:

<sup>1</sup>Department of Cardiovascular Medicine, Cleveland Clinic, Cleveland, OH

<sup>2</sup>C5Research, Department of Cardiovascular Medicine, Cleveland Clinic, Cleveland, OH

<sup>3</sup>South Australian Health and Medical Research Institute, University of Adelaide, Adelaide, Australia

Corresponding author: Stephen J. Nicholls, [stephen.nicholls@sahmri.com](mailto:stephen.nicholls@sahmri.com).

Clinical trial reg. no. NCT000620542, [clinicaltrials.gov](http://clinicaltrials.gov).

© 2015 by the American Diabetes Association. Readers may use this article as long as the work is properly cited, the use is educational and not for profit, and the work is not altered.

- insights from SATURN. *Diabetes Care* 2014;37:3114–3120 (Letter). *Diabetes Care* 2015;38:e27. DOI: 10.2337/dc14-2200
2. Stegman B, Puri R, Cho L, et al. High-intensity statin therapy alters the natural history of diabetic coronary atherosclerosis: insights from SATURN. *Diabetes Care* 2014;37:3114–3120
3. Nicholls SJ, Tuzcu EM, Kalidindi S, et al. Effect of diabetes on progression of coronary atherosclerosis and arterial remodeling: a pooled analysis of 5 intravascular ultrasound trials. *J Am Coll Cardiol* 2008;52:255–262
4. Räber L, Taniwaki M, Zaugg S, et al.; IBIS 4 (Integrated Biomarkers and Imaging Study-4) Trial Investigators. Effect of high-intensity statin therapy on atherosclerosis in non-infarct-related coronary arteries (IBIS-4): a serial intravascular ultrasonography study. *Eur Heart J*. 2 September 2014 [Epub ahead of print]
5. Hiro T, Kimura T, Morimoto T, et al.; JAPAN-ACS Investigators. Diabetes mellitus is a major negative determinant of coronary plaque regression during statin therapy in patients with acute coronary syndrome—serial intravascular ultrasound observations from the Japan Assessment of Pitavastatin and Atorvastatin in Acute Coronary Syndrome Trial (the JAPAN-ACS Trial). *Circ J* 2010;74:1165–1174
6. Puri R, Libby P, Nissen SE, et al. Long-term effects of maximally intensive statin therapy on changes in coronary atheroma composition: insights from SATURN. *Eur Heart J Cardiovasc Imaging* 2014;15:380–388
7. Puri R, Worthley MI, Nicholls SJ. Intravascular imaging of vulnerable coronary plaque: current and future concepts. *Nat Rev Cardiol* 2011;8:131–139
8. Hemmingsen B, Lund SS, Gluud C, et al. Targeting intensive glycaemic control versus targeting conventional glycaemic control for type 2 diabetes mellitus. *Cochran Database Syst Rev* 2013;11:CD008143
9. Kearney PM, Blackwell L, Collins R, et al.; Cholesterol Treatment Trialists' (CTT) Collaborators. Efficacy of cholesterol-lowering therapy in 18,686 people with diabetes in 14 randomised trials of statins: a meta-analysis. *Lancet* 2008;371:117–125
10. Stone NJ, Robinson JG, Lichtenstein AH, et al.; American College of Cardiology/American Heart Association Task Force on Practice Guidelines. 2013 ACC/AHA guideline on the treatment of blood cholesterol to reduce atherosclerotic cardiovascular risk in adults: a report of the American College of Cardiology/American Heart Association Task Force on Practice Guidelines. *J Am Coll Cardiol* 2014; 63(25 Pt. B):2889–2934
